# Supplementary material
Source: Springer Nature journal article supplement (https://www.springermedizin.de/resource/supplementary/12985_2010_796_MOESM1_ESM.pdf/9609212)

**A.**

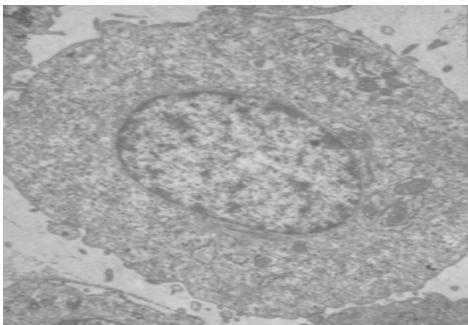

**B.**

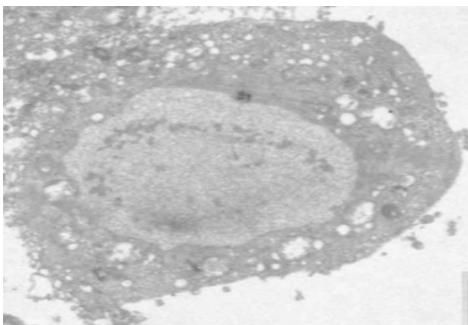

**C.**

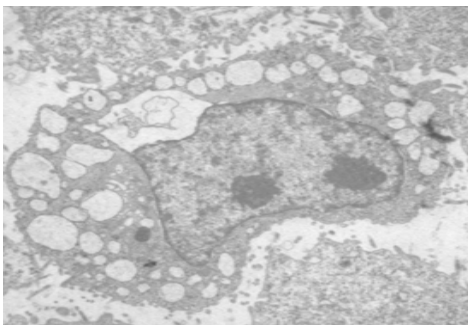

Supplement: MOESM1 [file 9609212]
